# Supplementary material for: Structural basis of self-assembly in the lipid-binding domain of mycobacterial polar growth factor Wag31
Source: PubMed Central journal article supplement (PMC7340271; doi:10.1107/s2052252520006053), 2020-06-30
Supplement: m-07-00767-sup1.pdf [file m-07-00767-sup1.pdf]

# IUCrJ

**Volume 7 (2020)**

**Supporting information for article:**

**Structural basis of self-assembling in the lipid-binding domain of mycobacterial polar growth factor Wag31**

**Komal Choukate and Barnali Chaudhuri**

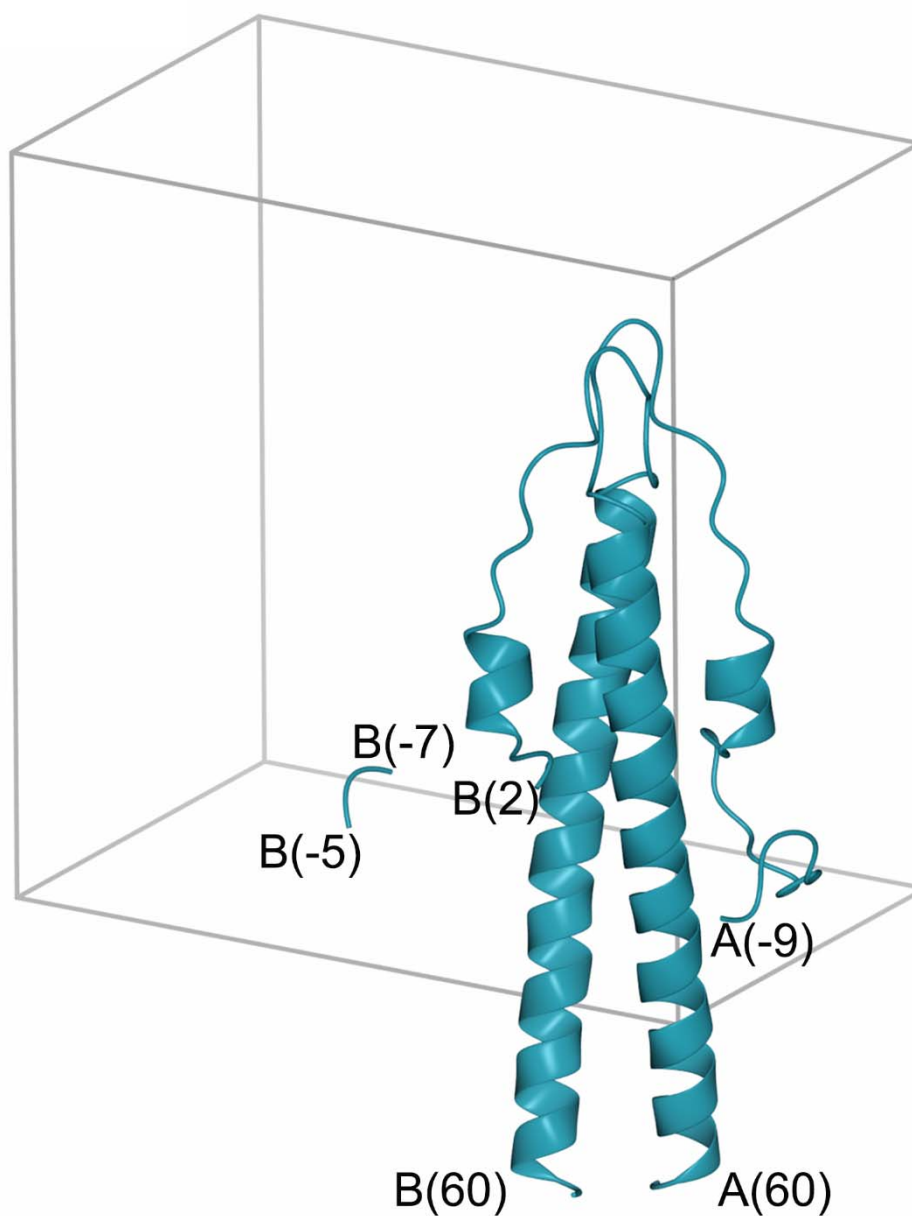

**Figure S1** Structure of N-Wag31. The monoclinic unit cell is shown as a box. N-Wag31 dimer within the asymmetric unit, including the poly-histidine tag regions (see experimental section), is shown as a cartoon in blue.

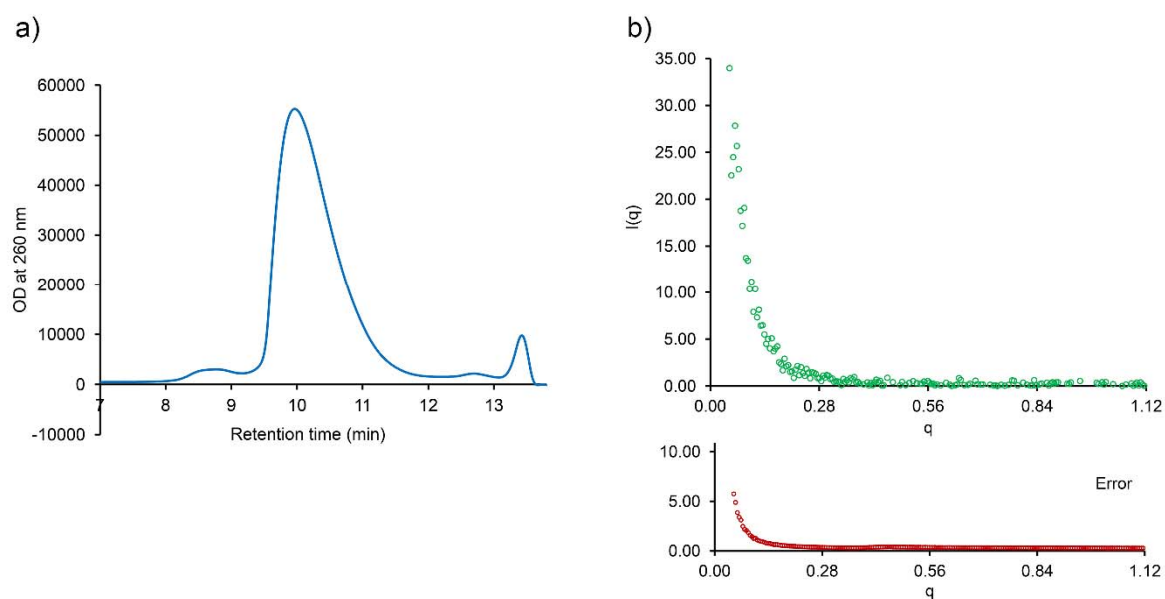

**Figure S2** SEC-SAXS data of N-Wag31. (a) UV elution profile (UV absorbance in arbitrary unit at 260 nm wave-length *versus* retention time in minutes) of N-Wag31 during the SEC-SAXS experiment. (b) Intensity ( $I$ ) *versus* momentum transfer ( $q$  in nm<sup>-1</sup>) for averaged SAXS intensity profile, and associated error, obtained from the peak I region shown in figure 3a.
